# Supplementary material
Source: PubMed Central journal article supplement (PMC3209537)

# Myosin Binding Protein C Slow is a Novel Substrate for Protein Kinase C (PKC) and A (PKA) in Skeletal Muscle

## SUPPLEMENT

Maegen A. Ackermann and Aikaterini Kontrogianni-Konstantopoulos

### Supplemental Figure Legends

SFig 1: A-B: Phosphorylation events mediated by PKC were identified in the NH<sub>2</sub>-terminal construct via mass spectrometry analysis using LTQ. MS/MS scans of peptides carrying phosphorylated Ser-83 (A) and Thr-84 (B) identified by Bioworks-SEQUEST with Xcorr scores of 2.827 and 2.94, respectively, and manually validated are shown. An immunoreactive band of ~150 kDa was detected in homogenates prepared from adult FDB muscle, using affinity-purified antibodies recognizing phosphorylated Ser-83 (inset in panel A) or Thr-84 (inset in panel B), confirming that native MyBP-C slow undergoes phosphorylation at those amino acids *in vivo*.

C: Schematic of a hypothetical MyBP-C slow protein containing all three novel insertions, highlighted in red, generated from a compilation of published sequences (NCBI accession numbers, EDL21488, HQ848554, HQ848555). Highlighted light and dark regions denote Ig and FNIII domains, respectively, while underlined regions indicate the three recombinant proteins, NH<sub>2</sub>-terminal construct, C7-domain construct and COOH-terminal construct. Residues identified by MS/MS to be phosphorylated are shown in bold.

D: *In vitro* kinase assays of wild type and mutant NH<sub>2</sub>-terminal constructs treated with PKA and PKC were separated by 1-D SDS-PAGE and stained with the ProQ Diamond phospho-specific and Sypro Ruby total protein dyes. Wild

type (GST-NH<sub>2</sub> terminal construct), but not mutant forms in which Ser 59 and Ser 62 (GST-NH<sub>2</sub> terminal construct S59A/S62A) or Ser 83 and Thr 84 (GST-NH<sub>2</sub> terminal construct S83A/T84A) were tandemly mutated to Ala, stain positive with ProQ Diamond dye, following treatment with PKA or PKC, respectively, confirming the phosphorylation events identified by mass spectrometry.

SFig 2: A-B: Portions of MyBP-C slow (A, top panel), fast (B, top panel) and GAPDH (A and B, bottom panels) were amplified using RT-PCR analysis and cDNA prepared from wild type and MDX FDB and TA muscles. Densitometry of the amplified fragments was used to calculate the relative amounts of MyBP-C slow and fast transcripts in normal and dystrophic muscles after being normalized to those of GAPDH; percent changes are reported in bar graphs (Students t-test,  $p < 0.01$ ). C-F: Localization of MyBP-C slow and fast in wild type and MDX skeletal muscle. Wild type (C1-C3 and E1-E3) and MDX (D1-D3 and F1-F3) TA muscles were co-stained with antibodies for MyBP-C slow (C1 and D1; green) or MyBP-C fast (E1 and F1; green) and the Rho-GEF domain of obscurin (C2 and D2, and E2 and F2; red), which specifically labels M-bands. The localization of MyBP-C fast is not altered in TA dystrophic muscle; however, MyBP-C slow is moderately affected in ~10% of myofibers.

**Supplemental Table 1**

| <b>Directional Cloning Primers</b> |                              |                                              |                                             |
|------------------------------------|------------------------------|----------------------------------------------|---------------------------------------------|
| <b>Amplicon</b>                    | <b>Sense Primer</b>          |                                              | <b>Antisense Primer</b>                     |
| NH <sub>2</sub> -domain            | ATGCCAGAACCCACTAAG           |                                              | ATCGAGAATTTTTGCAA                           |
| C7-domain                          | AGCCCTCCTACTCTTCTG           |                                              | GGGCTCACTAGCCCCAGC                          |
| COOH-domain                        | CCCATGTTTACTCAACCT           |                                              | CGACTGTTGCTGCCCCTC                          |
| MyBP-C fast                        | CCCAAGTTCCTGACA              |                                              | TCACTGCGGCAC                                |
| GAPDH                              | TGATGACATCAAGAAGGTGGTGAAG    |                                              | TCCTTGGAGGCCATGTGGGCCAT                     |
| <b>Mutagenesis Primers</b>         |                              |                                              |                                             |
| <b>Mutation</b>                    | <b>Template</b>              | <b>Sense Primer</b>                          | <b>Antisense Primer</b>                     |
| NH <sub>2</sub> -S59A domain       | NH <sub>2</sub> -domain      | ATGGAGAGAAAAGATGCAGAATG<br>GTCTCTGGTGAG      | CTCACCAAGAGACCATTCTGCAT<br>CTTTTCTCTCCAG    |
| NH <sub>2</sub> -S59A/S62A domain  | NH <sub>2</sub> -S59A domain | GAAAAAGATGCAGAATGGGCTCT<br>TGGTGAGTCACCTGCTG | CAGCAGGTGACTCACCAAGAGCC<br>CATTCTGCATCTTTTC |
| NH <sub>2</sub> -S83A domain       | NH <sub>2</sub> -domain      | GCCAACTCCCAGCTGGCCACCCT<br>GTTTGTGAAAAAC     | GTTTTTCAACAAACAGGGTGGCC<br>AGCTGGGAGTTGGC   |
| NH <sub>2</sub> -S83A/T84A domain  | NH <sub>2</sub> -S83A domain | CAACTCCCAGCTGGCCGCCCTGT<br>TTGTTGAAAAACCTC   | GAGGTTTTTCAACAAACAGGGCG<br>GCCAGCTGGGAGTTG  |

# SFig. 1

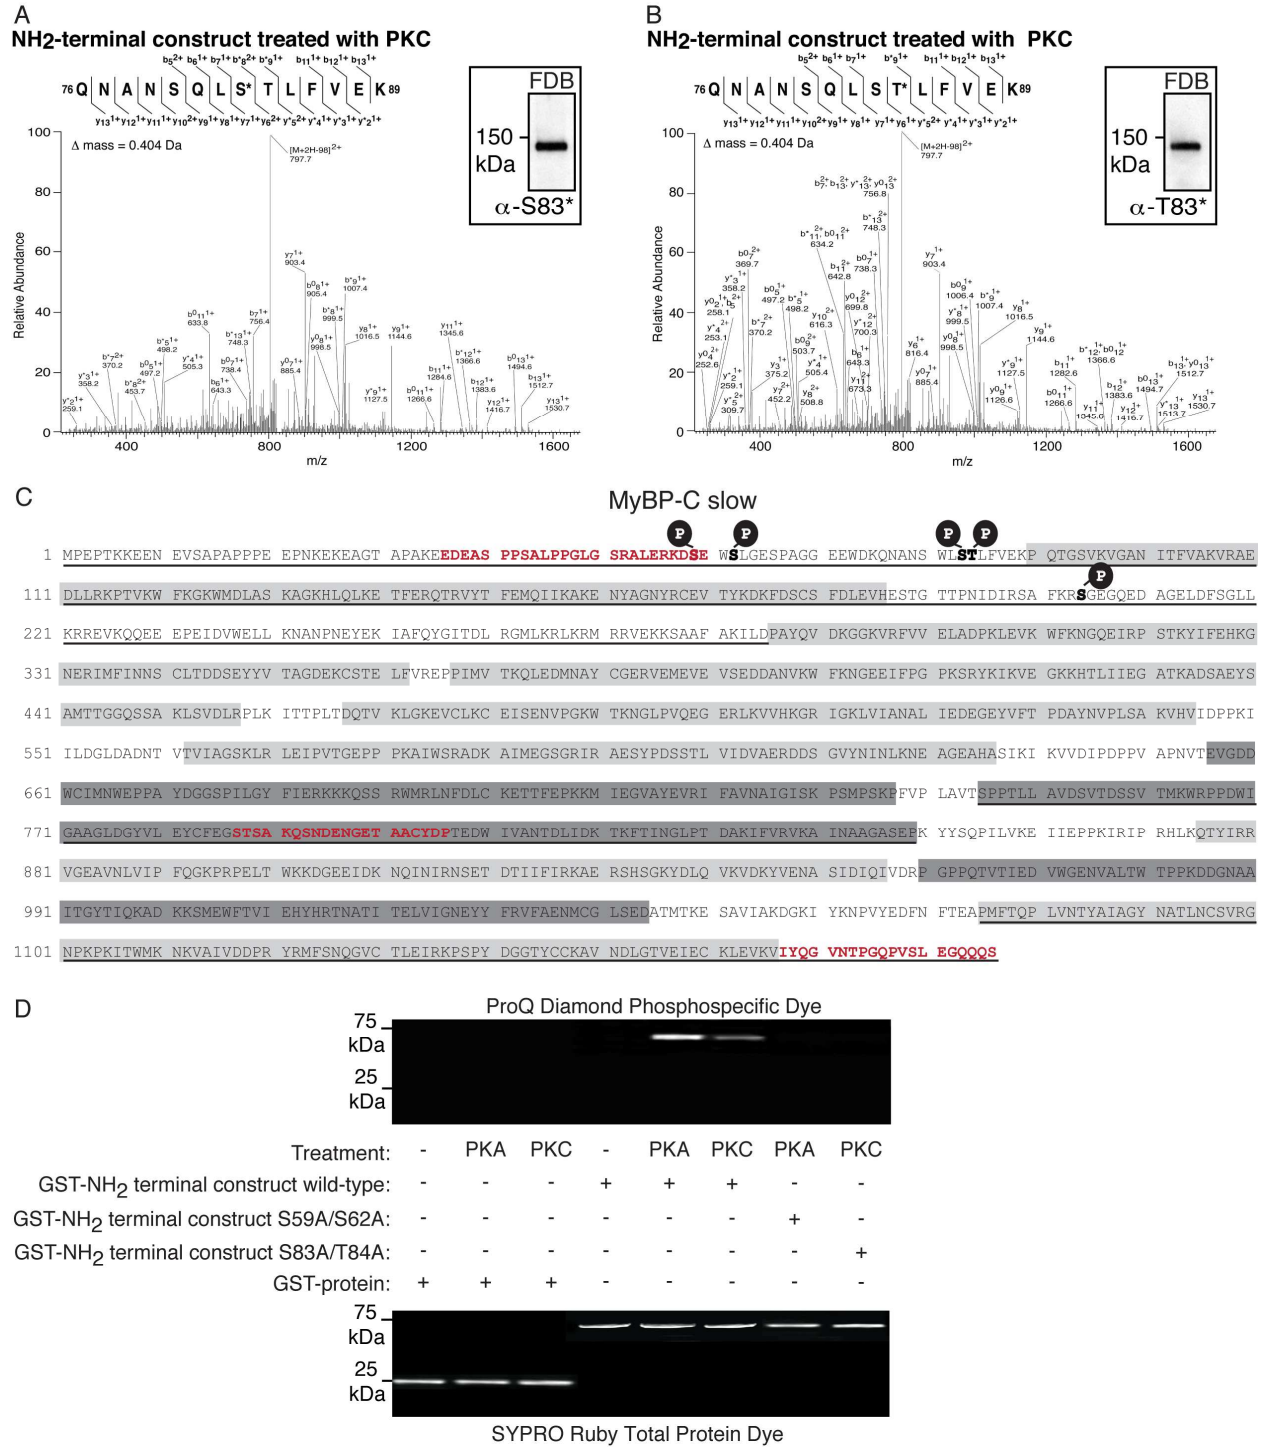

SFig. 2

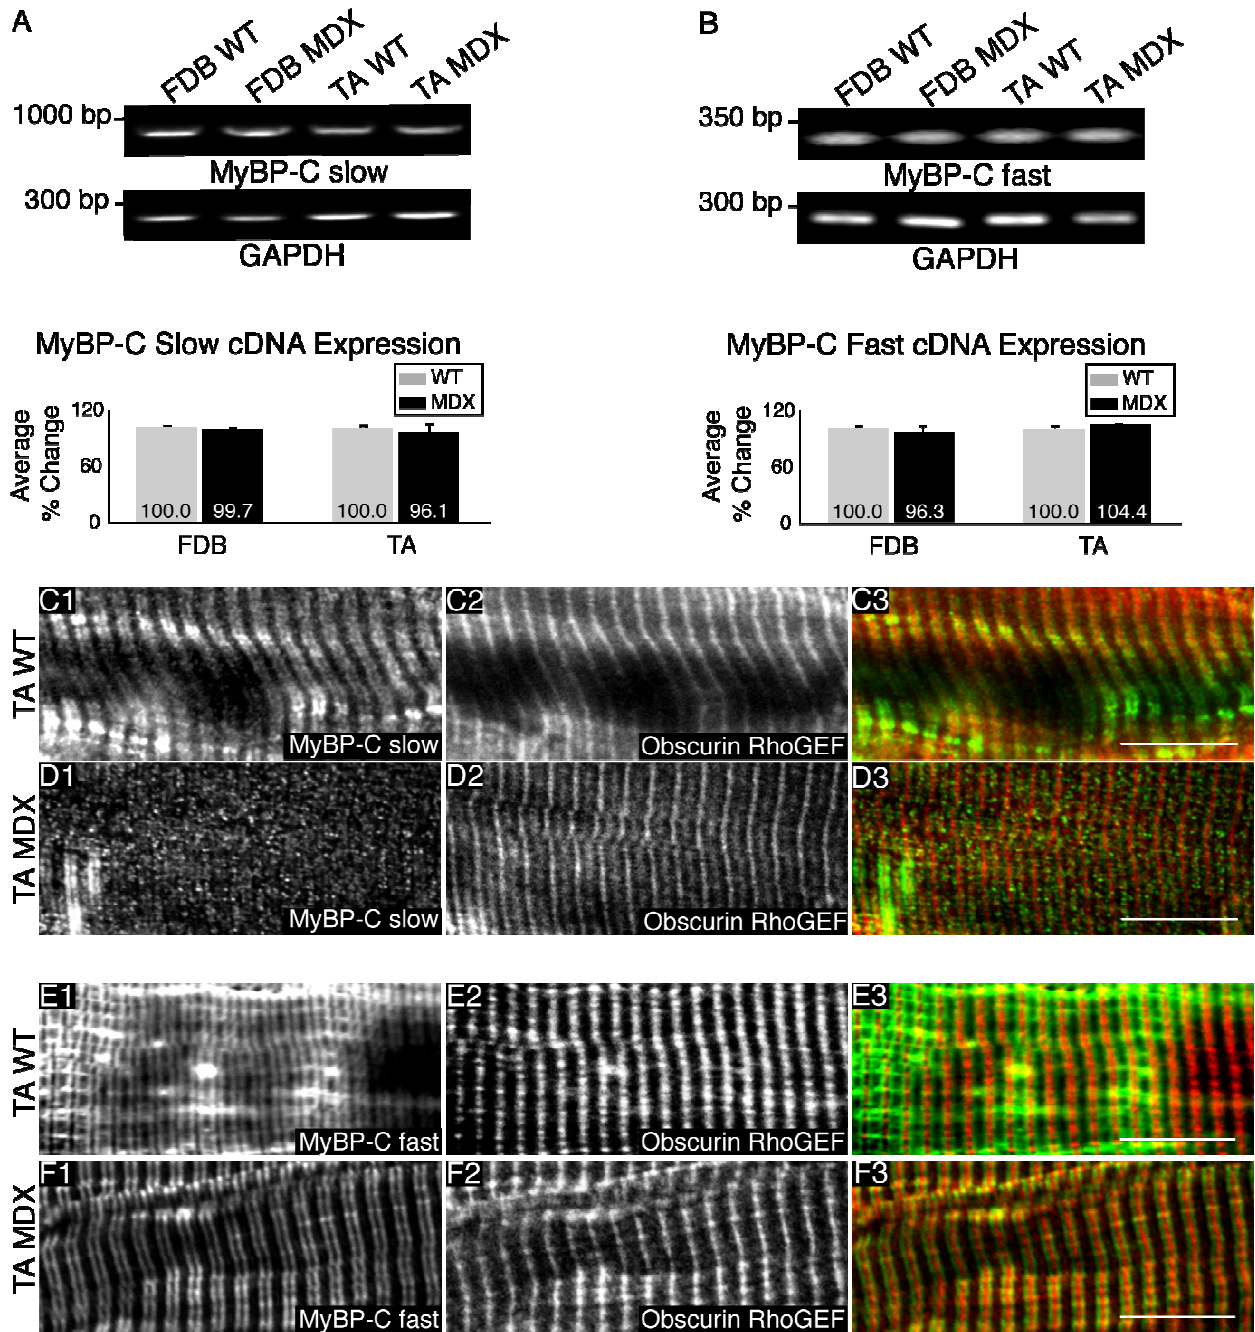

Supplement: NIHMS326811-supplement-1_si_001.pdf [file NIHMS326811-supplement-1_si_001.pdf]
